# Supplementary material for: Antipsychotic Treatment Among Youths With Attention-Deficit/Hyperactivity Disorder
Source: PubMed Central journal article supplement (PMC6661708; doi:10.1001/jamanetworkopen.2019.7850), 2019-07-26
Supplement: jamanetwopen-2-e197850-s001.pdf [file jamanetwopen-2-e197850-s001.pdf]

## Supplementary Online Content

Sultan RS, Wang S, Crystal S, Olfson M. Antipsychotic treatment among youths with attention-deficit/hyperactivity disorder. *JAMA Netw Open*. 2019;2(7):e197850. doi:10.1001/jamanetworkopen.2019.7850

**eTable.** Coding For MarketScan Data (2010-2015)

**eFigure.** Survival Curve Comparing Age Group to Time of Antipsychotic Initiation in Youth With a New ADHD Diagnosis

This supplementary material has been provided by the authors to give readers additional information about their work.

**eTable.** Coding for MarketScan Data (2010-2015)

| <b>Characteristics</b>        | <b>MarketScan Coding</b>                                                                                                                                                                                                                                                                                                                                                                    |
|-------------------------------|---------------------------------------------------------------------------------------------------------------------------------------------------------------------------------------------------------------------------------------------------------------------------------------------------------------------------------------------------------------------------------------------|
| Bipolar Disorder              | 296.0x, 296.1x, 296.4x, 296.5x, 296.6x, 296.7x, 296.8x, (F30-F31.xx)                                                                                                                                                                                                                                                                                                                        |
| Psychosis                     | 295.xx, 297.X, 298.XX, (F20.xx- F29.xx)                                                                                                                                                                                                                                                                                                                                                     |
| Autism Spectrum Disorder      | 299.XX, (F84.xx)                                                                                                                                                                                                                                                                                                                                                                            |
| Tourette's Disorder           | 307.2x (F95.xx)                                                                                                                                                                                                                                                                                                                                                                             |
| Oppositional Defiant Disorder | 313.81 (F91.3)                                                                                                                                                                                                                                                                                                                                                                              |
| Conduct Disorder              | 312.XX (F91.x, excluding F91.3)                                                                                                                                                                                                                                                                                                                                                             |
| Anxiety Disorder              | 300.0x, 300.2x, 300.3, 309.21, 300.09, 300.20-300.23, 300.29, 300.3, 300.7, 312.39, 313.0, 313.21, 313.23 (F41.xx, F42.xx, F93.x, F40.x, F45.xx, F63.3, F94.0)                                                                                                                                                                                                                              |
| Self-harm / Suicidality       | E950-E959, V62.84, (X71-X83, R45.851)                                                                                                                                                                                                                                                                                                                                                       |
| Depression Disorder           | 296.2x, 296.3x, 298.0, 300.4, 311 (F32.xx-F34.xx)                                                                                                                                                                                                                                                                                                                                           |
| Substance use Disorder        | 303-305, 303.xx, 305, 304.xx (F10.xx – F19.xx)                                                                                                                                                                                                                                                                                                                                              |
| Developmental Disability      | 317.xx – 319.xx (F70-F79)                                                                                                                                                                                                                                                                                                                                                                   |
| Inpatient Mental Health Care  | (STDPLAC 21 or 51) and Any inpatient discharge with a first listed mental disorder (290-319) (F01-F99)                                                                                                                                                                                                                                                                                      |
| Neuro Developmental Disorder  | Prader Willi (759.81,Q87.1), Tuberous sclerosis (759.5, Q85.1), Fetal alcohol syndrome (760.71, Q86.0), Fragile X (759.83, Q99.2), Cerebral Palsy (343.8, G80.4), taxia-telangiectasia ( 334.8, G11.3), Neurofibromatosis (759.6, Q85.8), Metachromatic Leukodystrophy (330.0, E75.25) Wilson's Disease (275.1, E83.01), Huntington's Disease (333.4, G10) Krabbe's Disease (330.0, E75.23) |

**eFigure.** Survival Curve Comparing Age Group to Time of Antipsychotic Initiation in Youth With a New ADHD Diagnosis

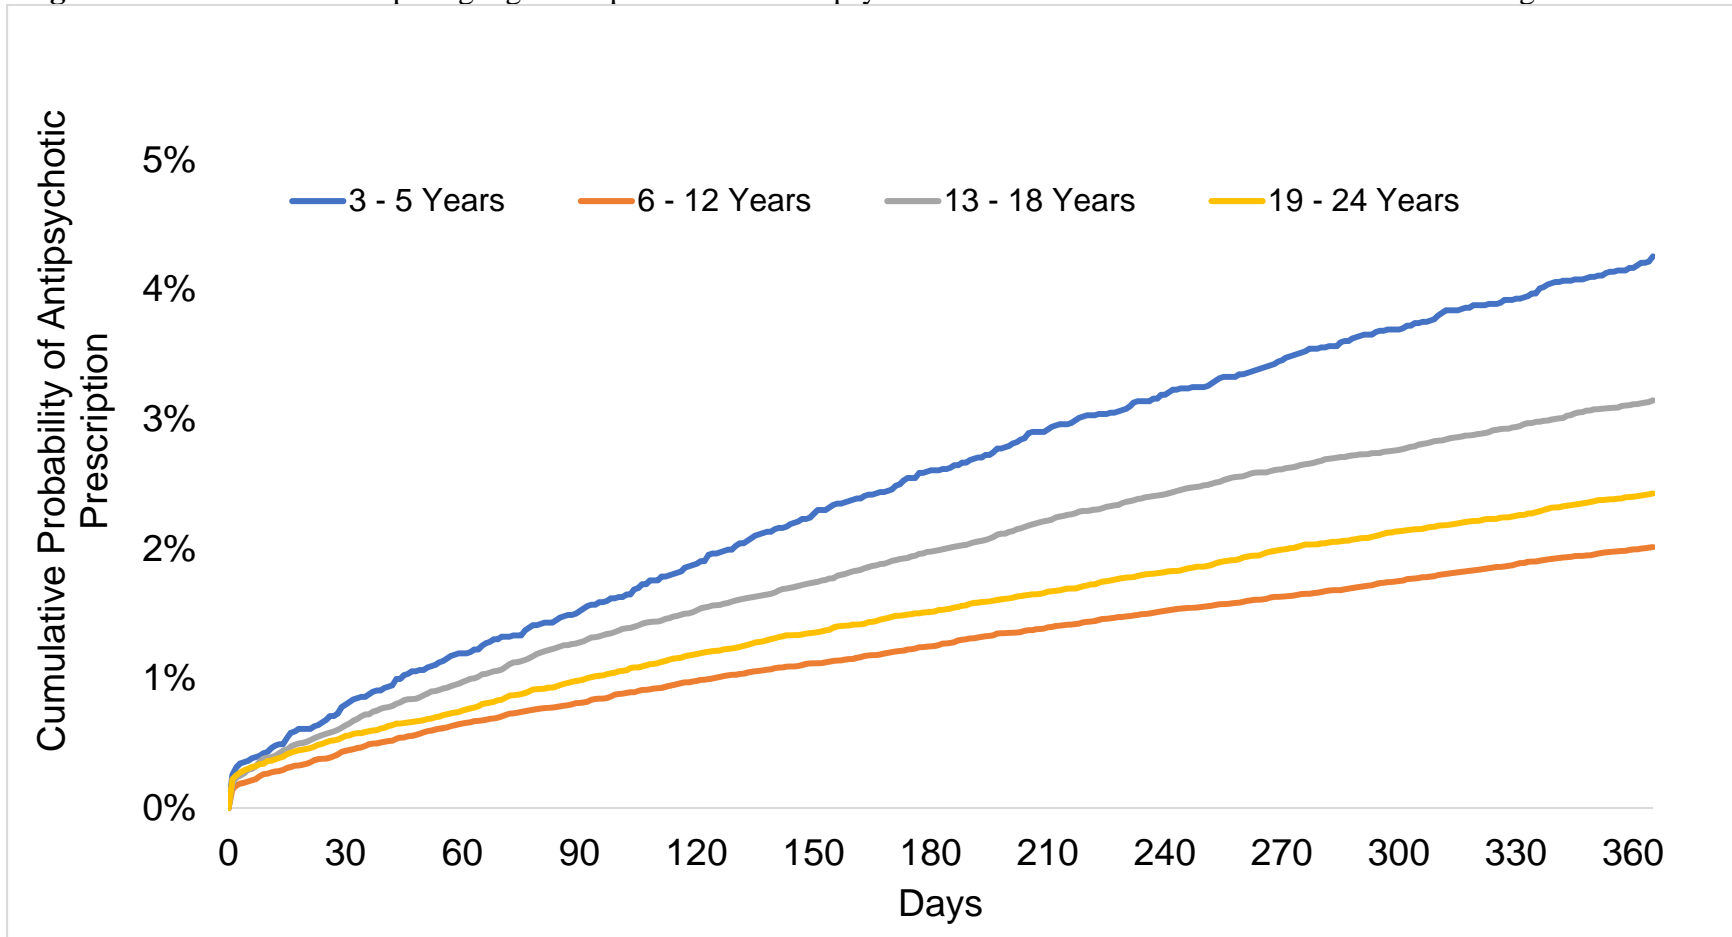

Source: 2010-2015, MarketScan Data. Sample Sizes: 3-5 Years (415), 6-12 Years (1,264), 13-18 Years (1,629), 19-24 Years (1,000). All groups were significantly different from each other ( $P < 0.001$ ).
